# Supplementary material
Source: PubMed Central journal article supplement (PMC4019006)

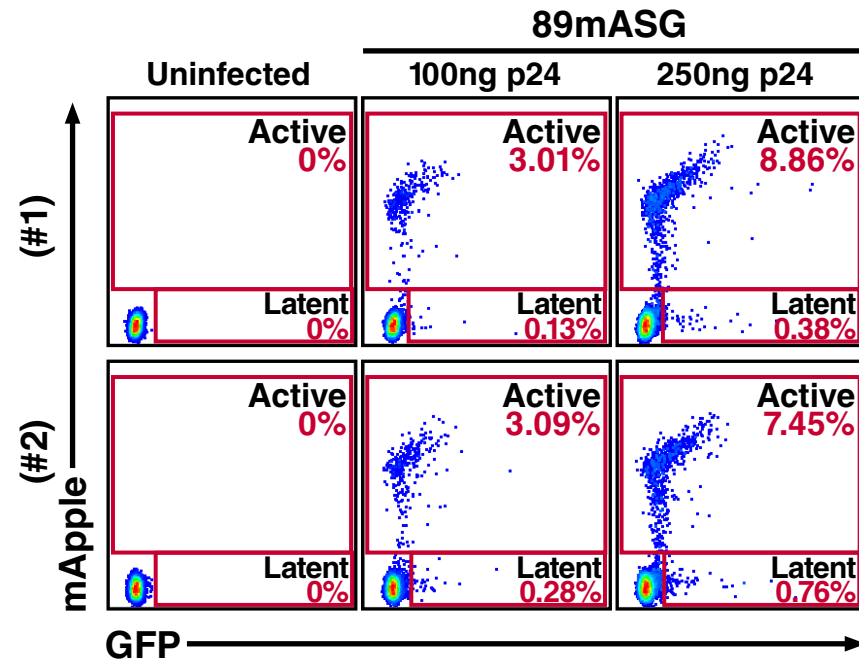

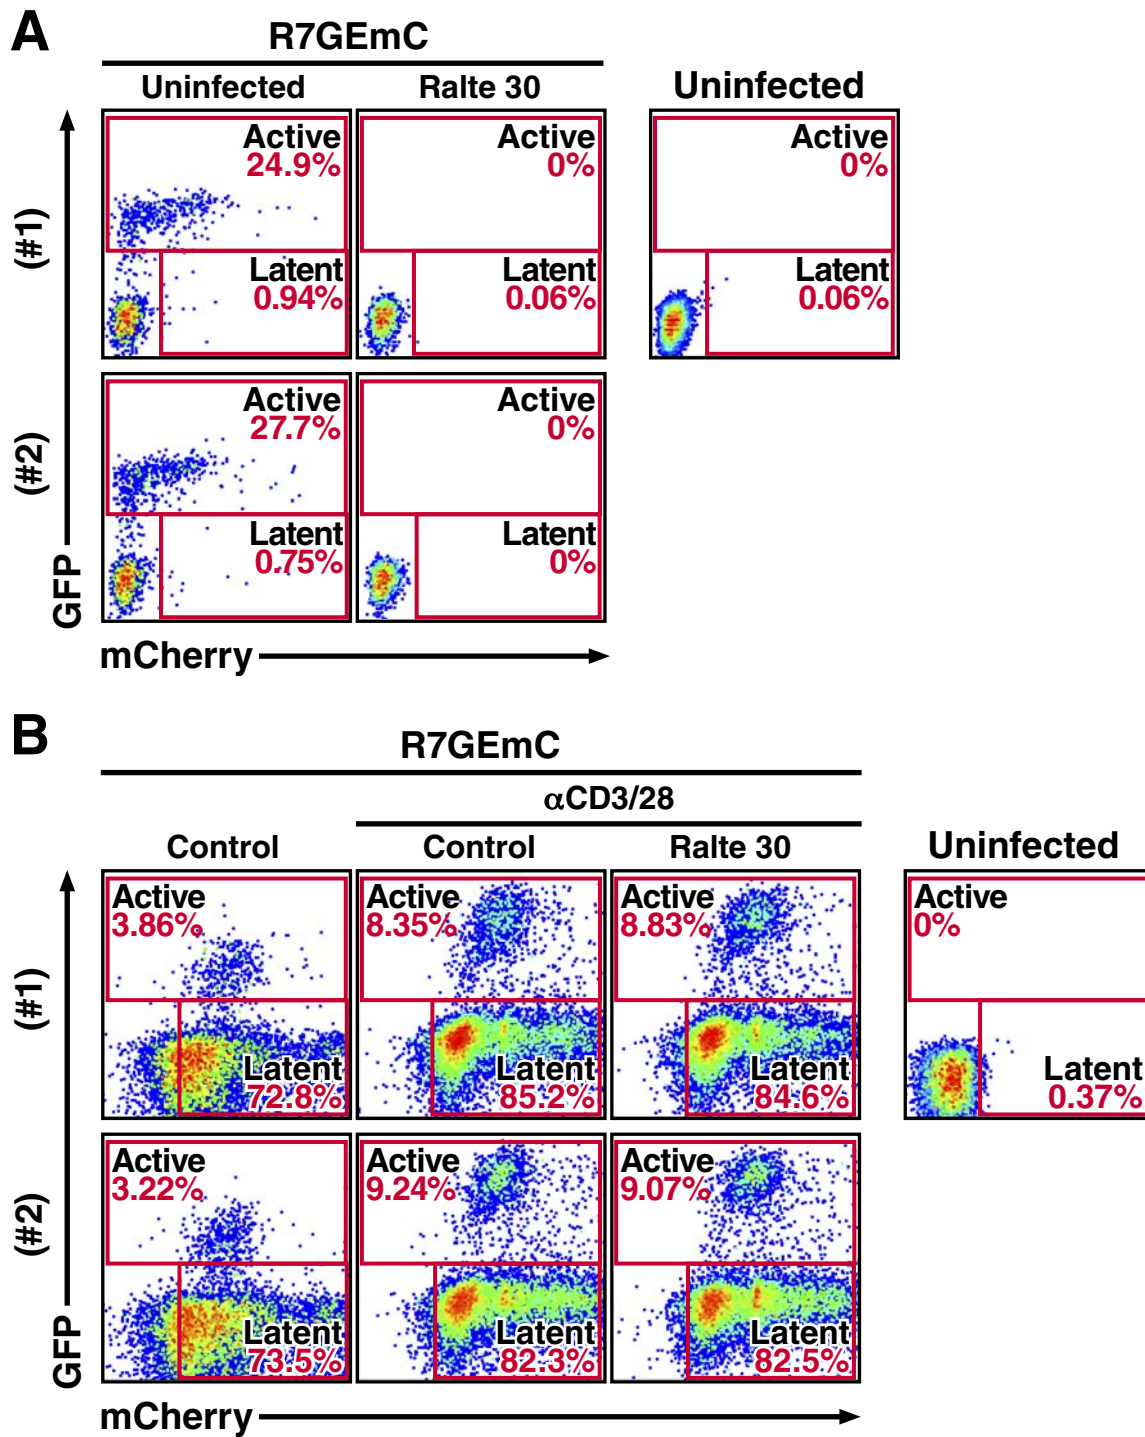

Supplement: NIHMS576600-supplement-supplement_1.pdf [file NIHMS576600-supplement-supplement_1.pdf]
